# Supplementary material
Source: Springer Nature journal article supplement (https://www.springermedizin.de/resource/supplementary/13075_2010_3038_MOESM6_ESM.pdf/9693394)
Supplement: MOESM6 [file 9693394]

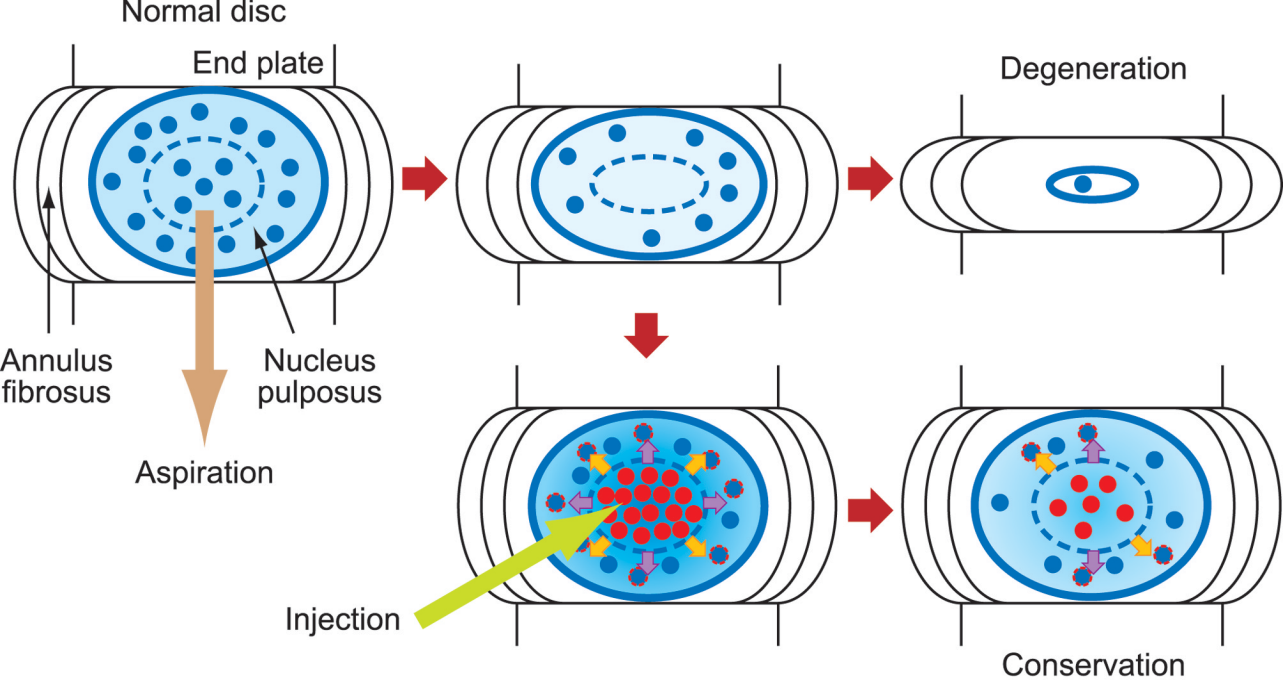

● Host nucleus pulposus cells

● Transplanted synovial MSCs

← Induction for type II collagen

↘ Anti-degradative and anti-inflammatory effects

● Affected host nucleus pulposus cells
